# Supplementary material for: Characterization of α-Glucosidase Inhibitors from Psychotria malayana Jack Leaves Extract Using LC-MS-Based Multivariate Data Analysis and In-Silico Molecular Docking
Source: PubMed Central journal article supplement (PMC7763559; doi:10.3390/molecules25245885), 2020-12-12

Figure S1. Fragmentation pathway of three identified compounds.

1. Compound 1 (315.1775):

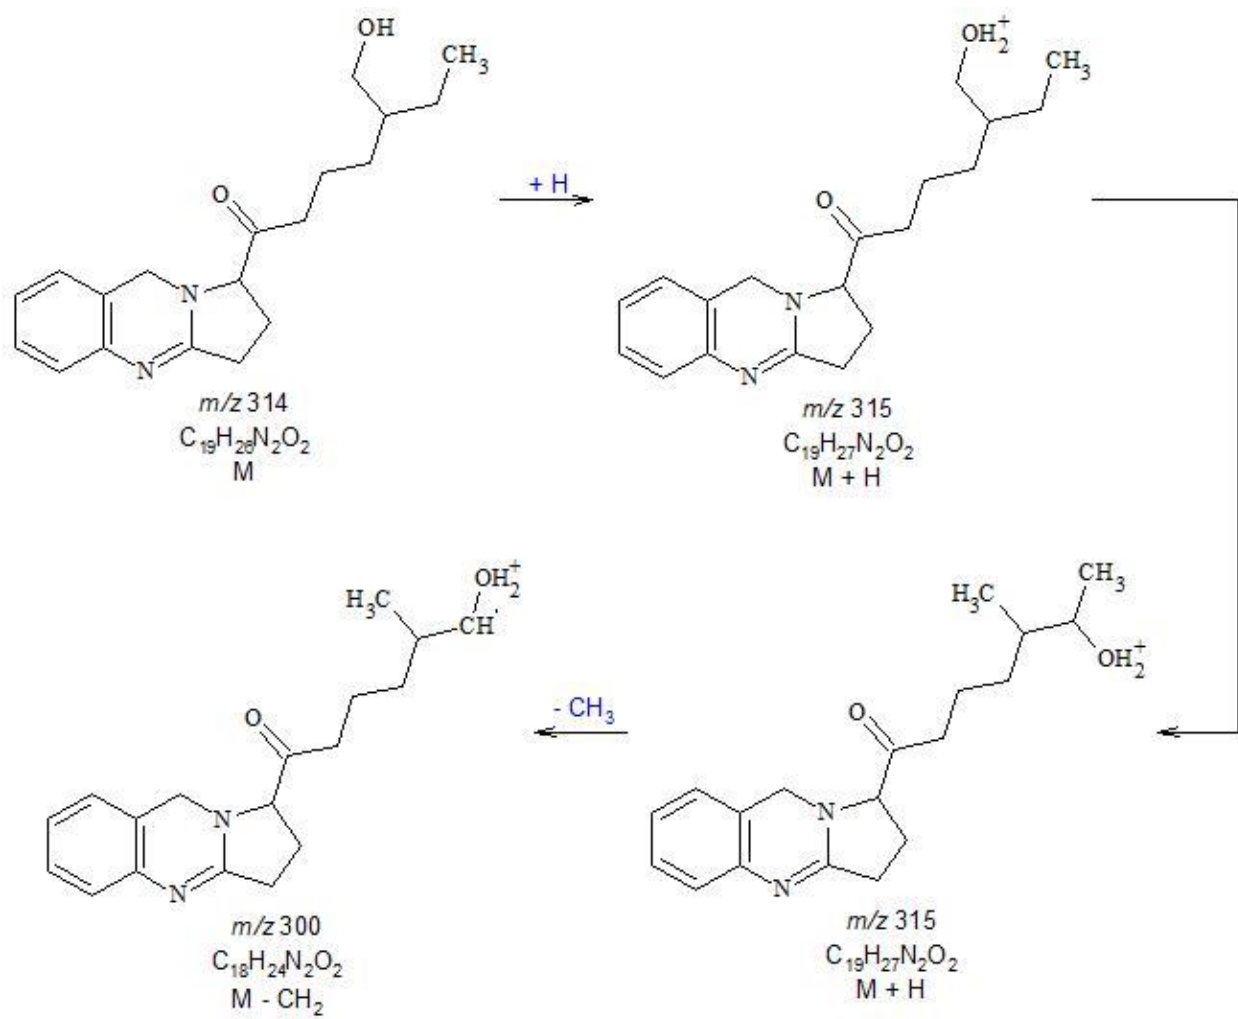

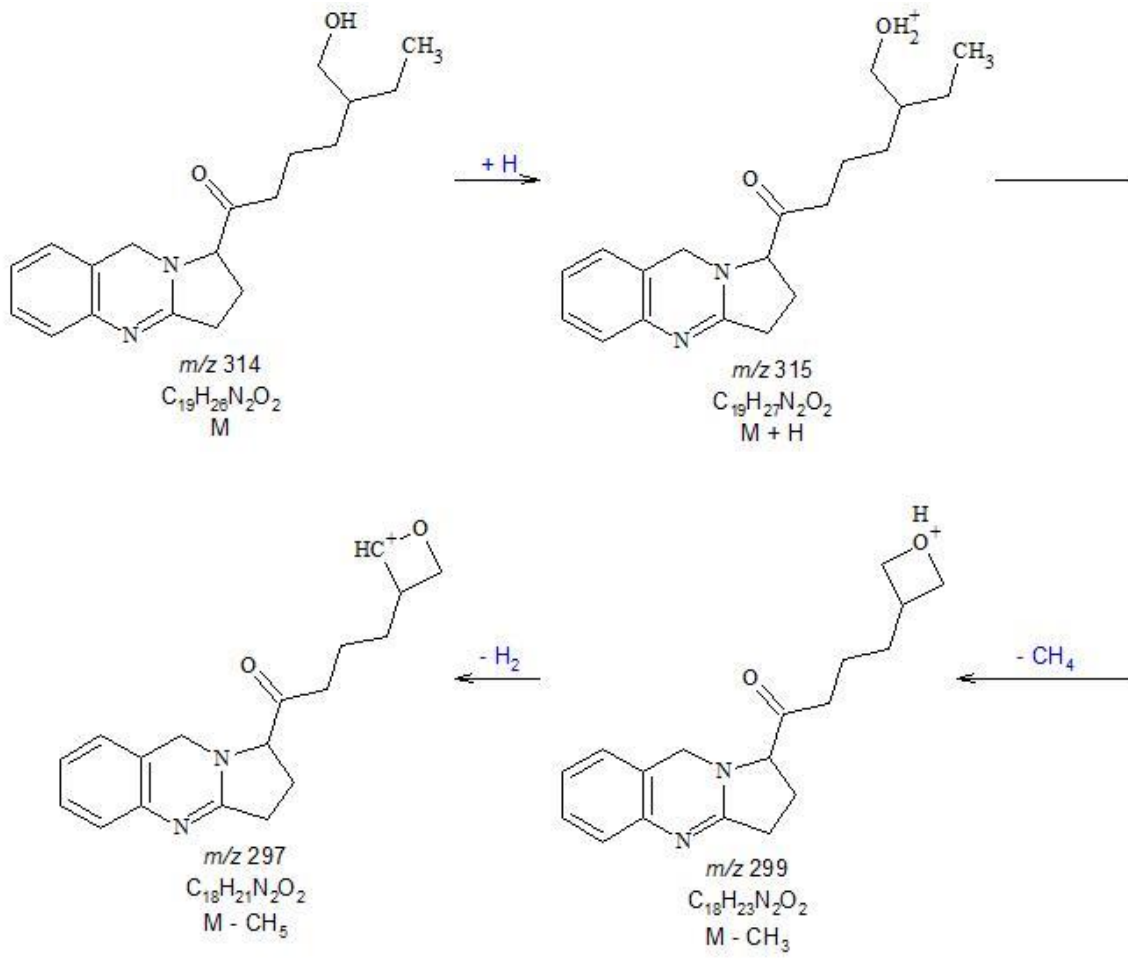

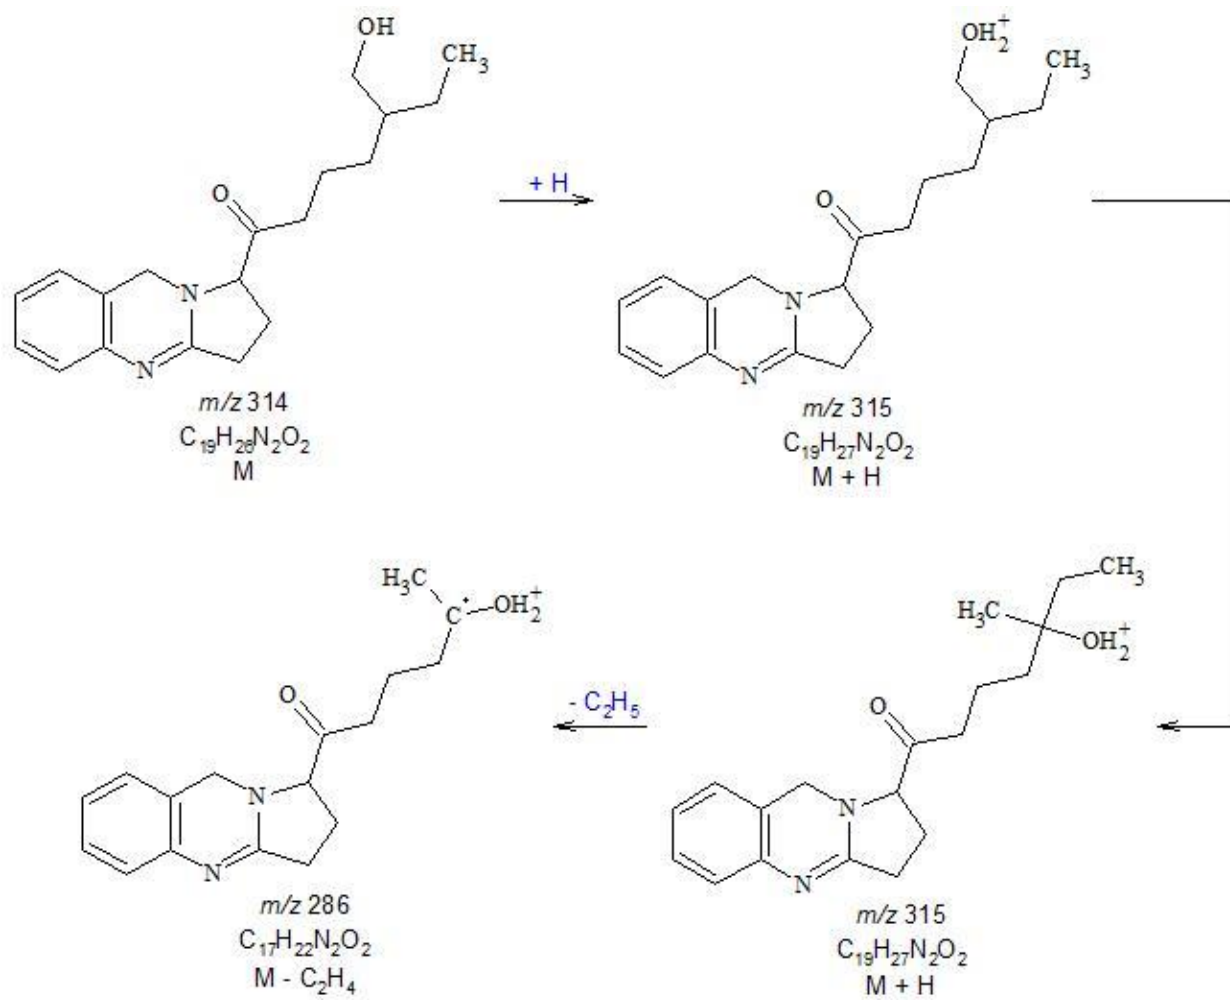

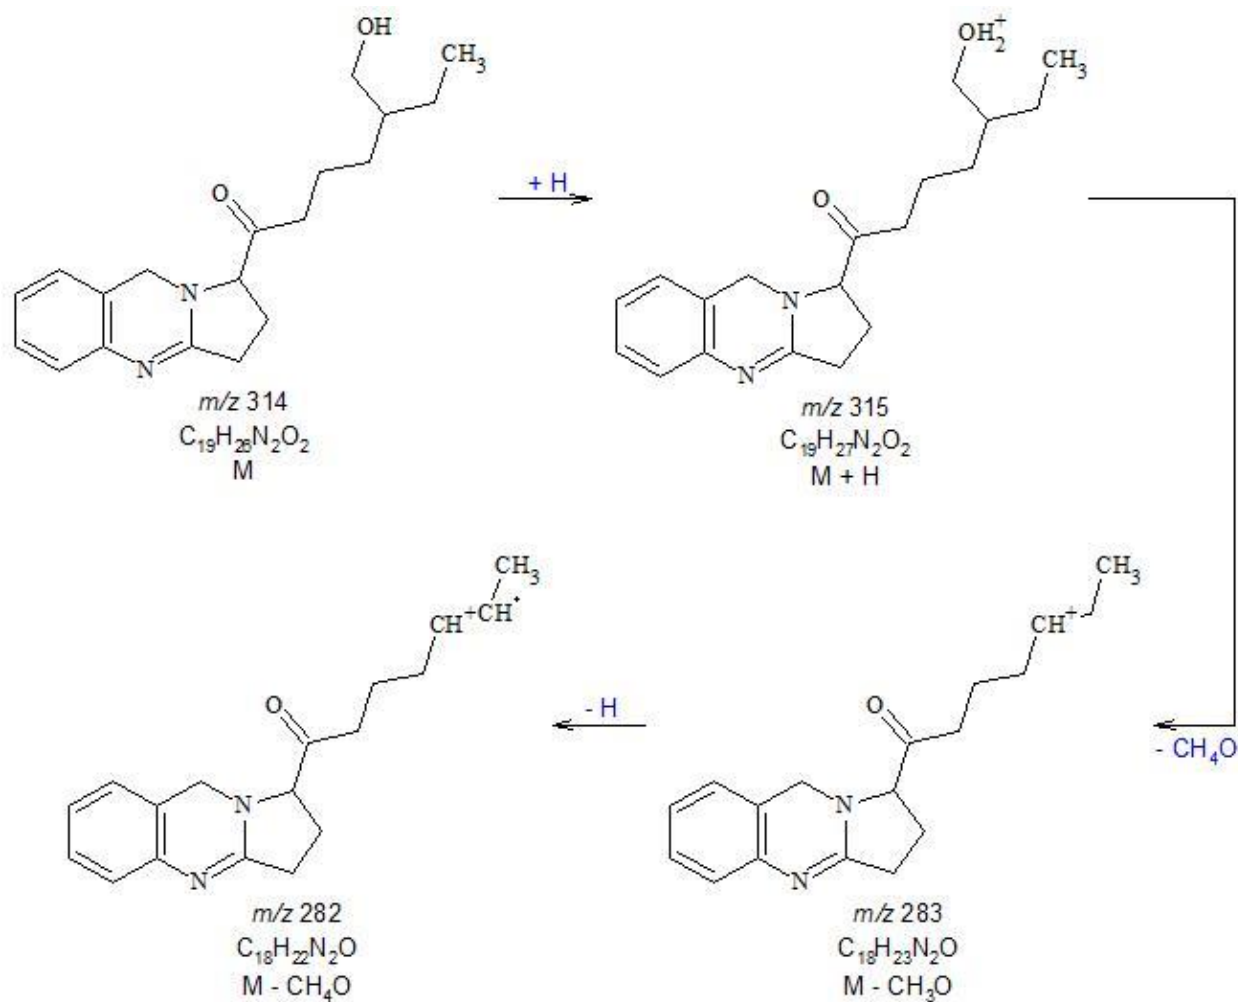

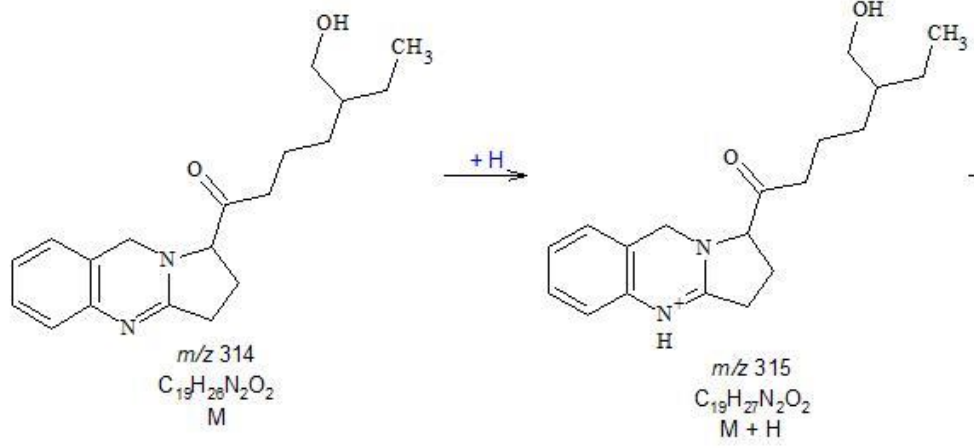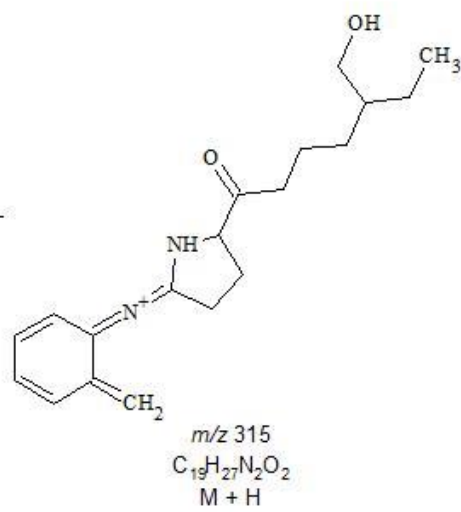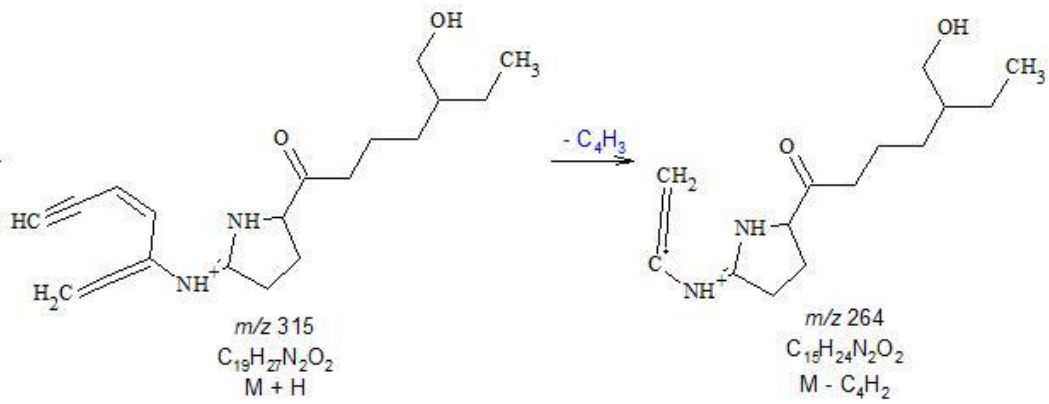

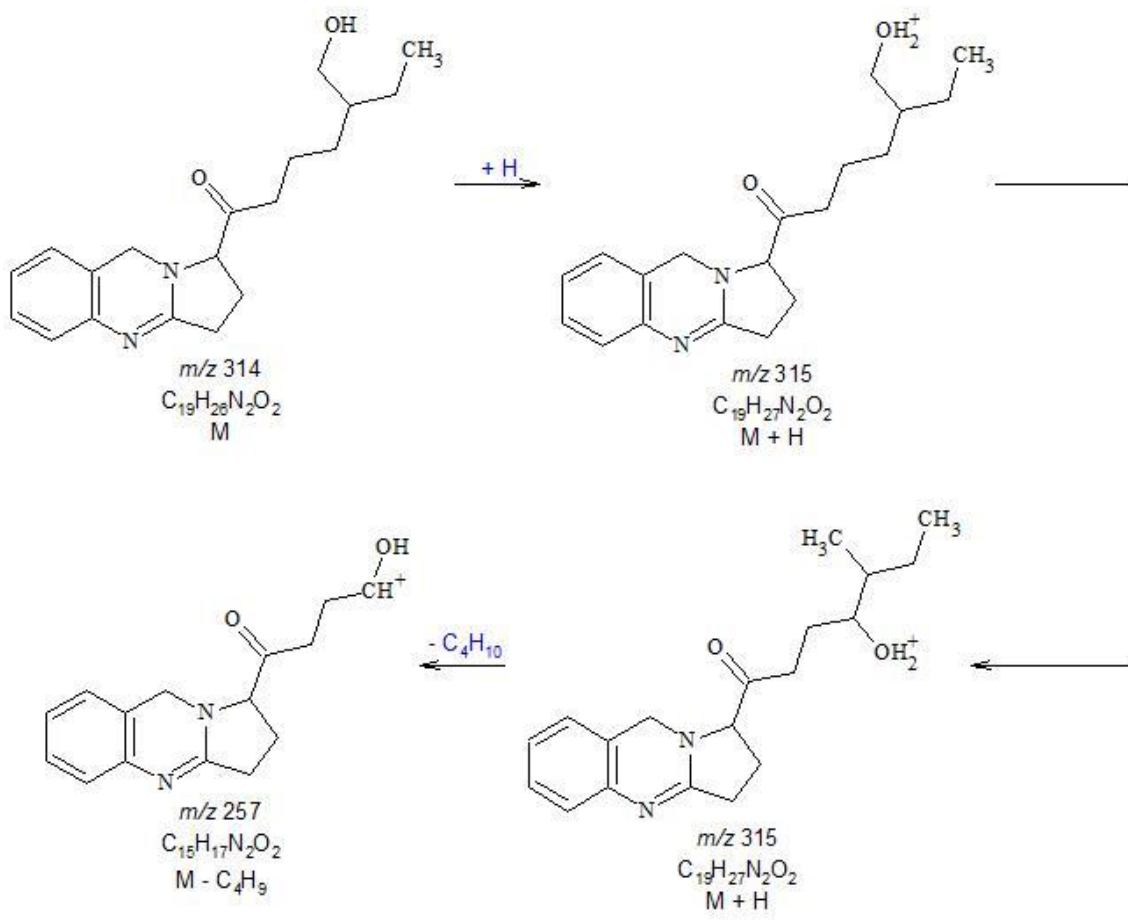

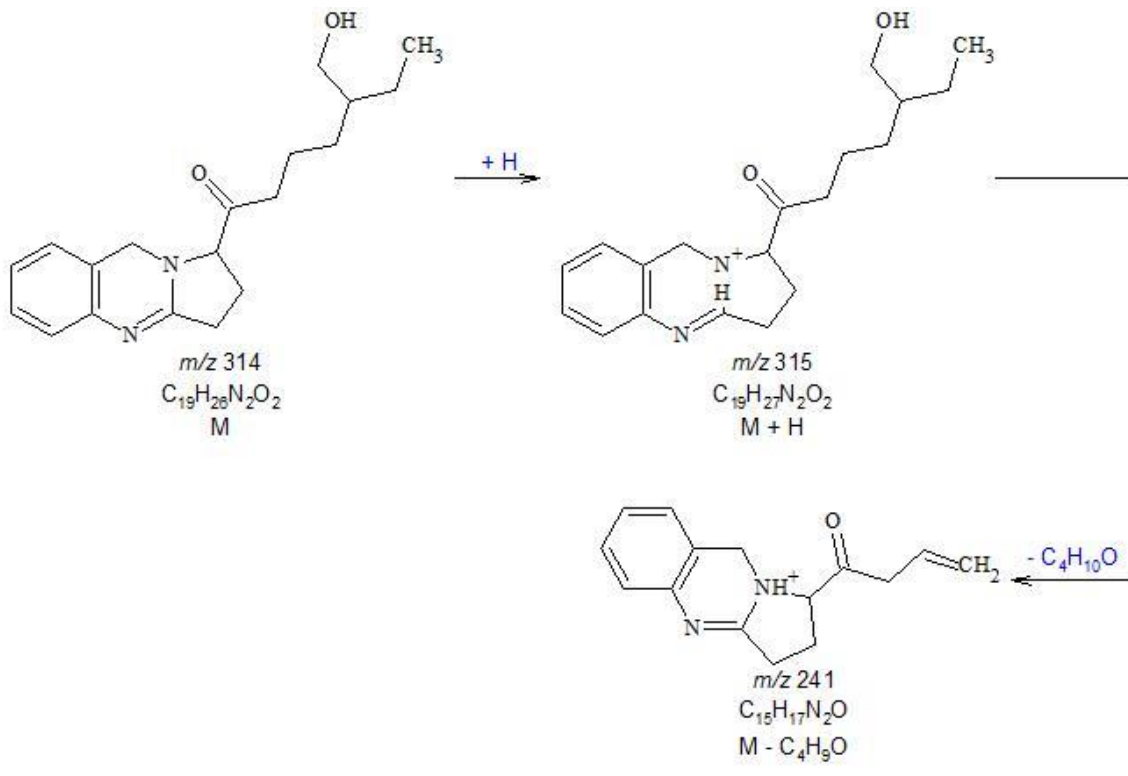

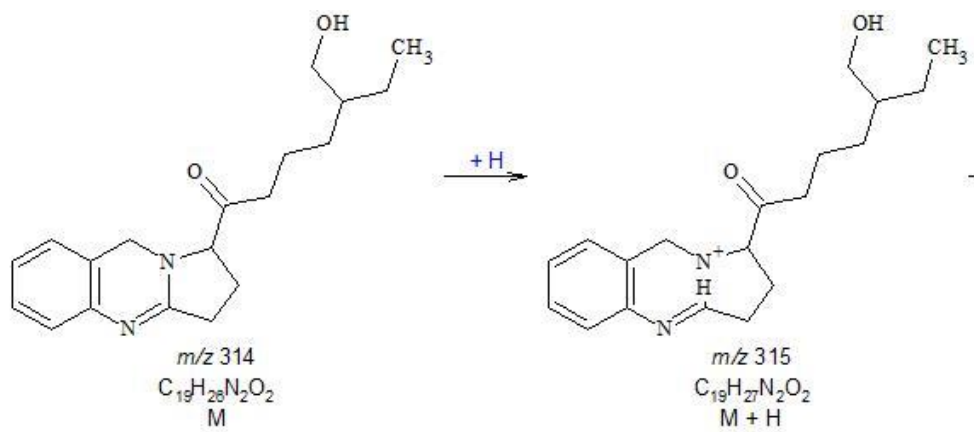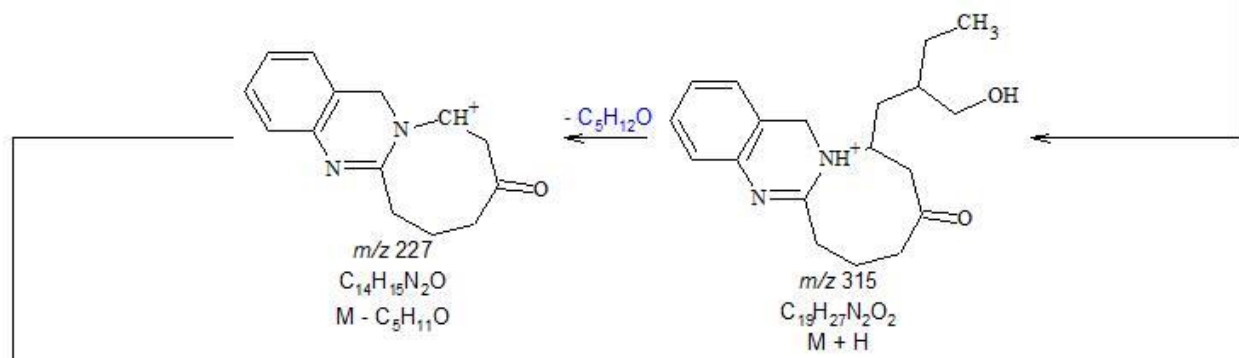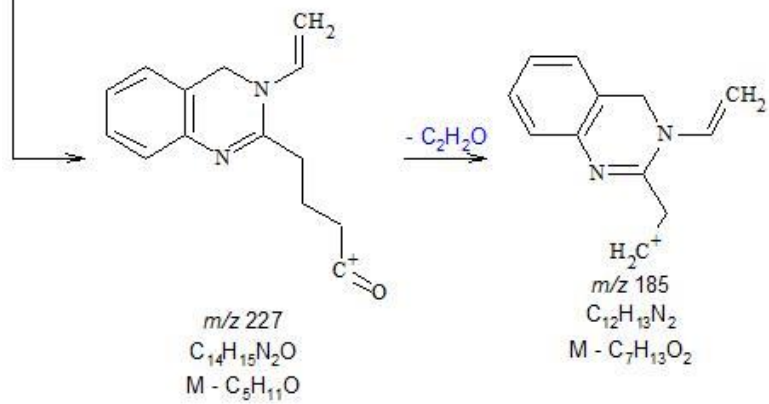





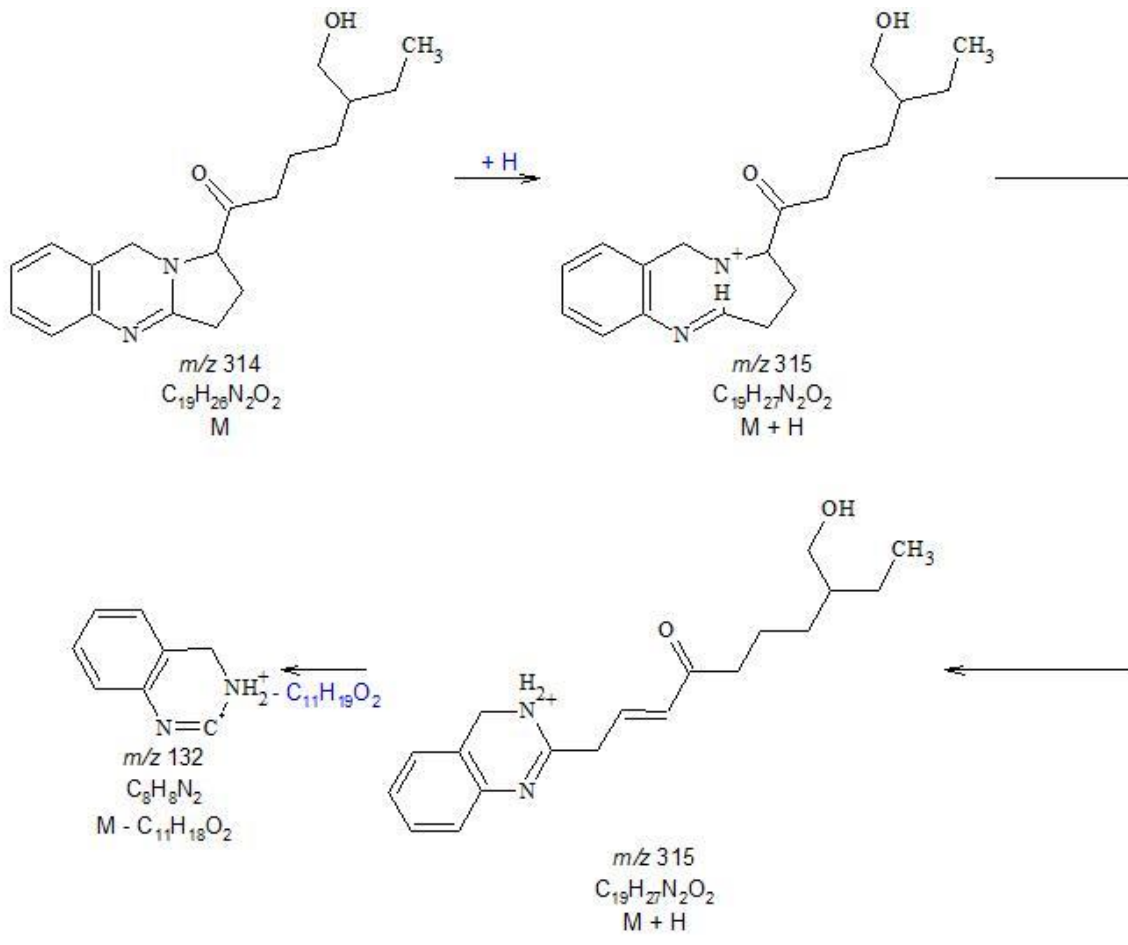

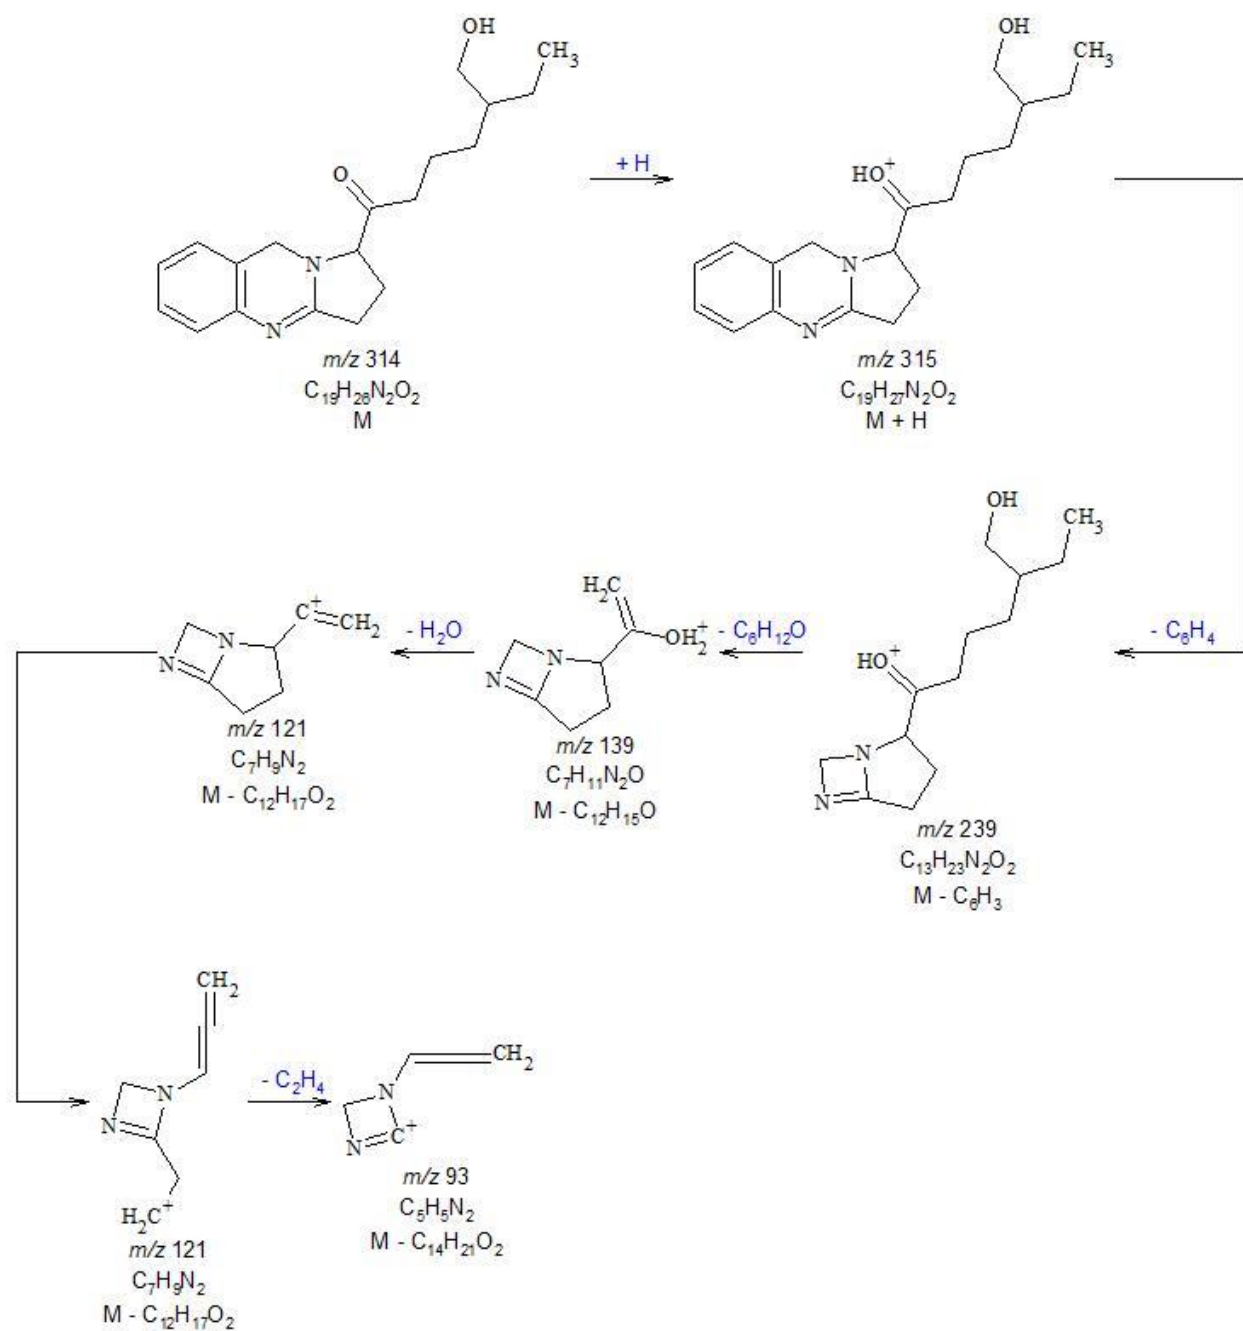

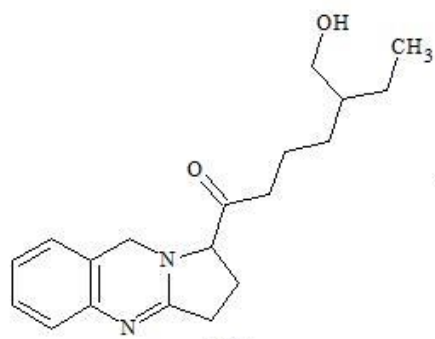

+H<sub>2</sub>

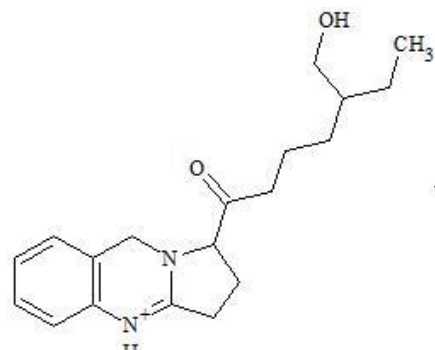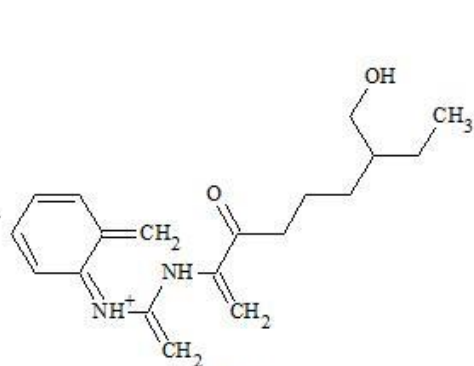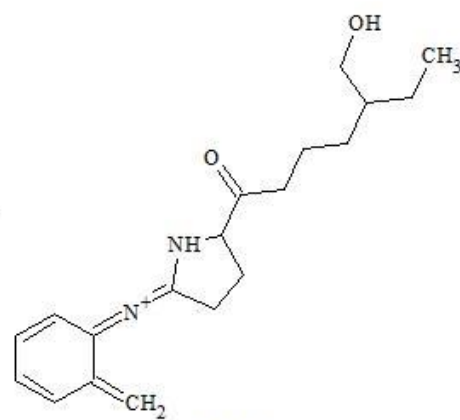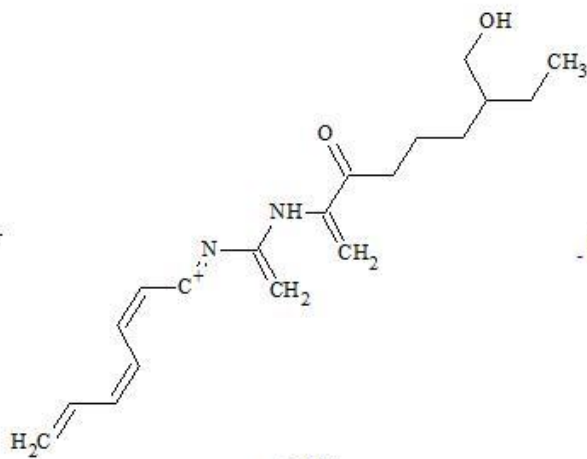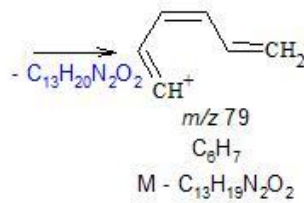

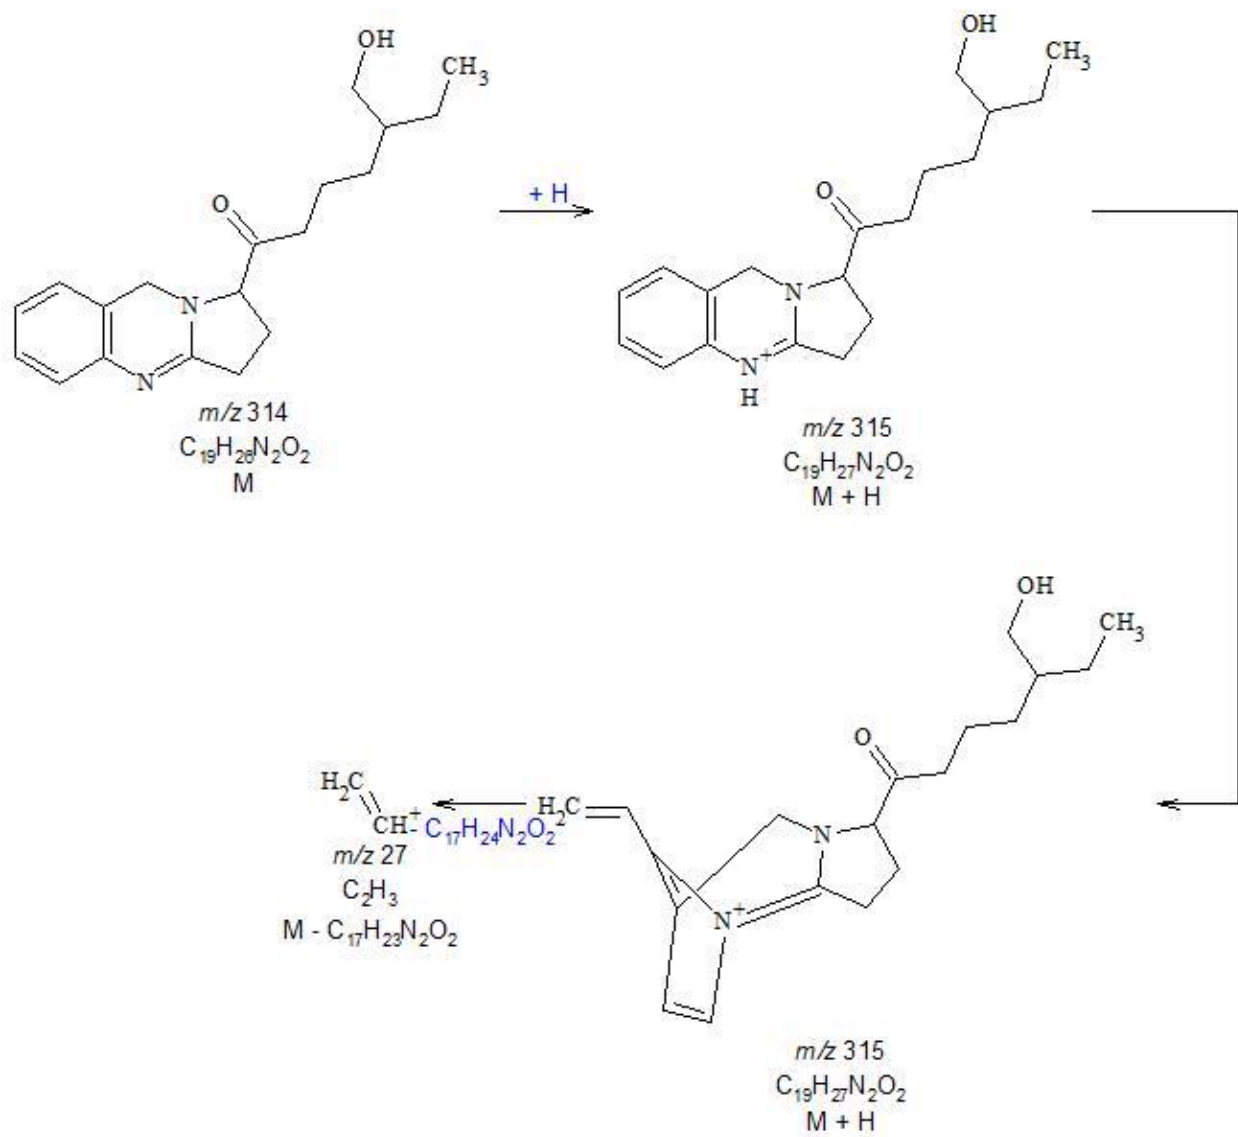

2. Compound 2 (317.2882):

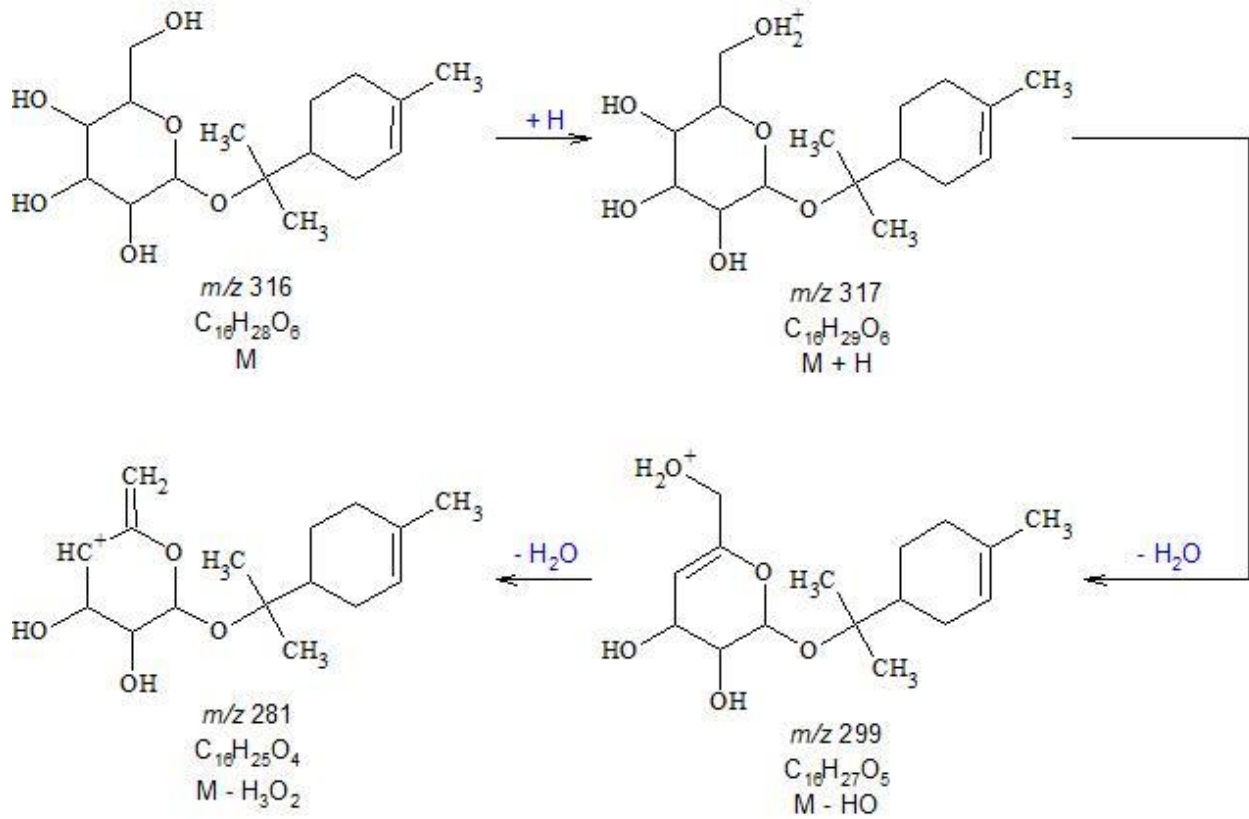

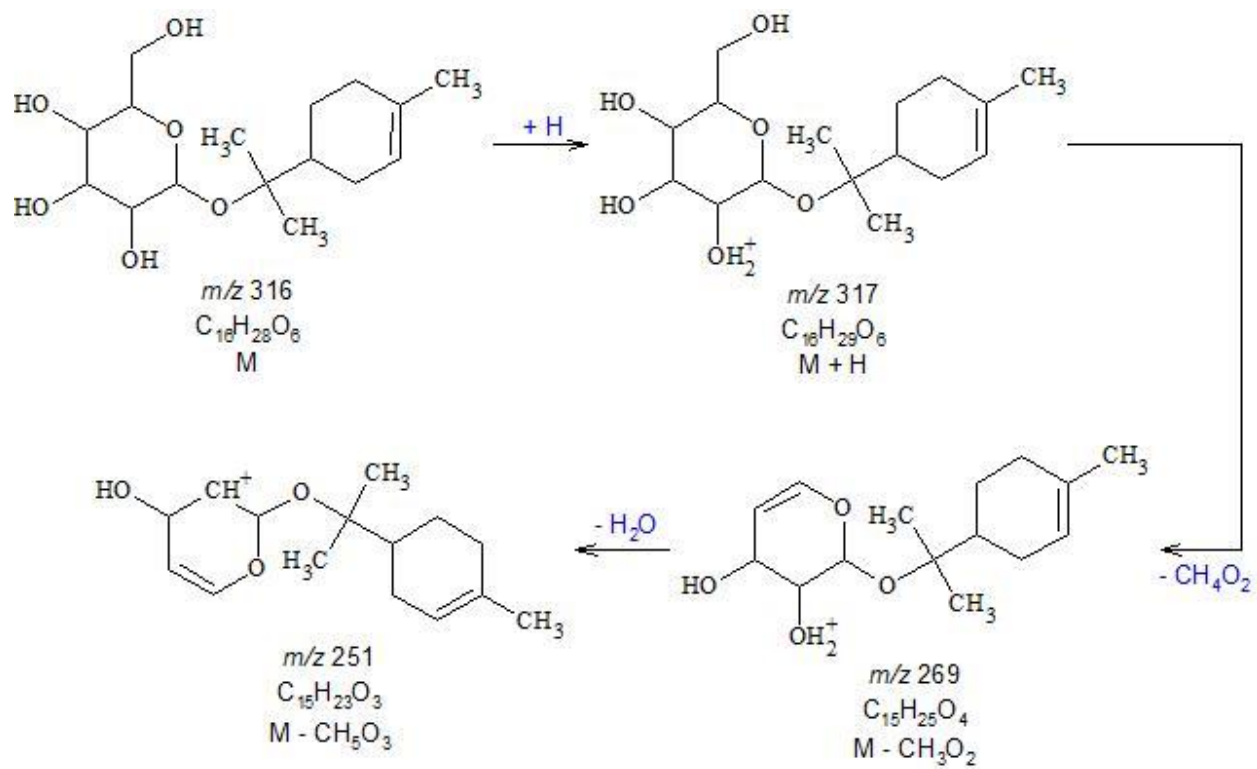

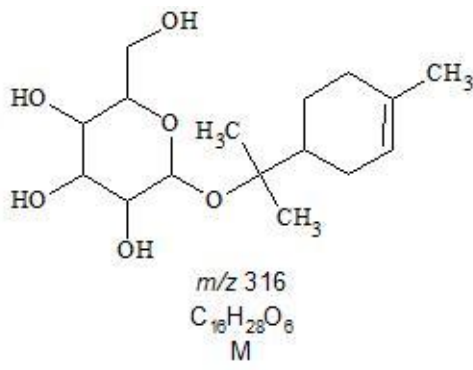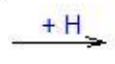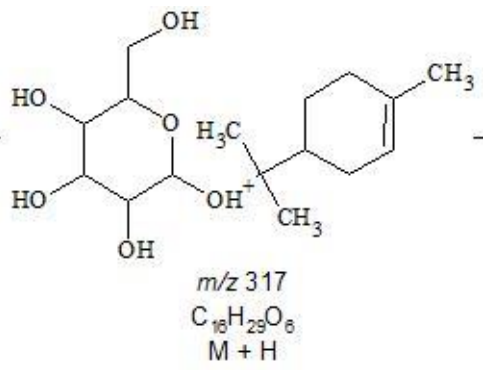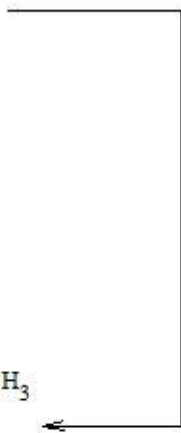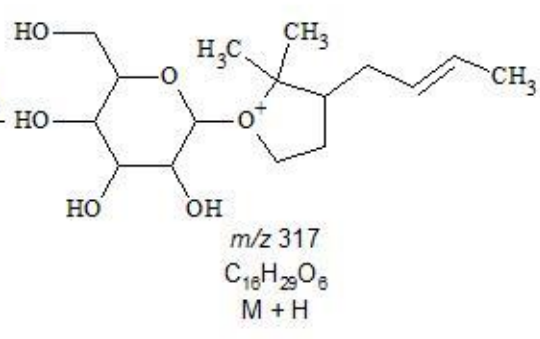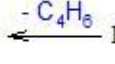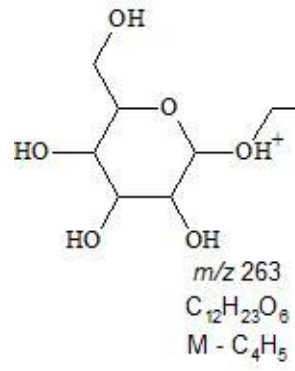



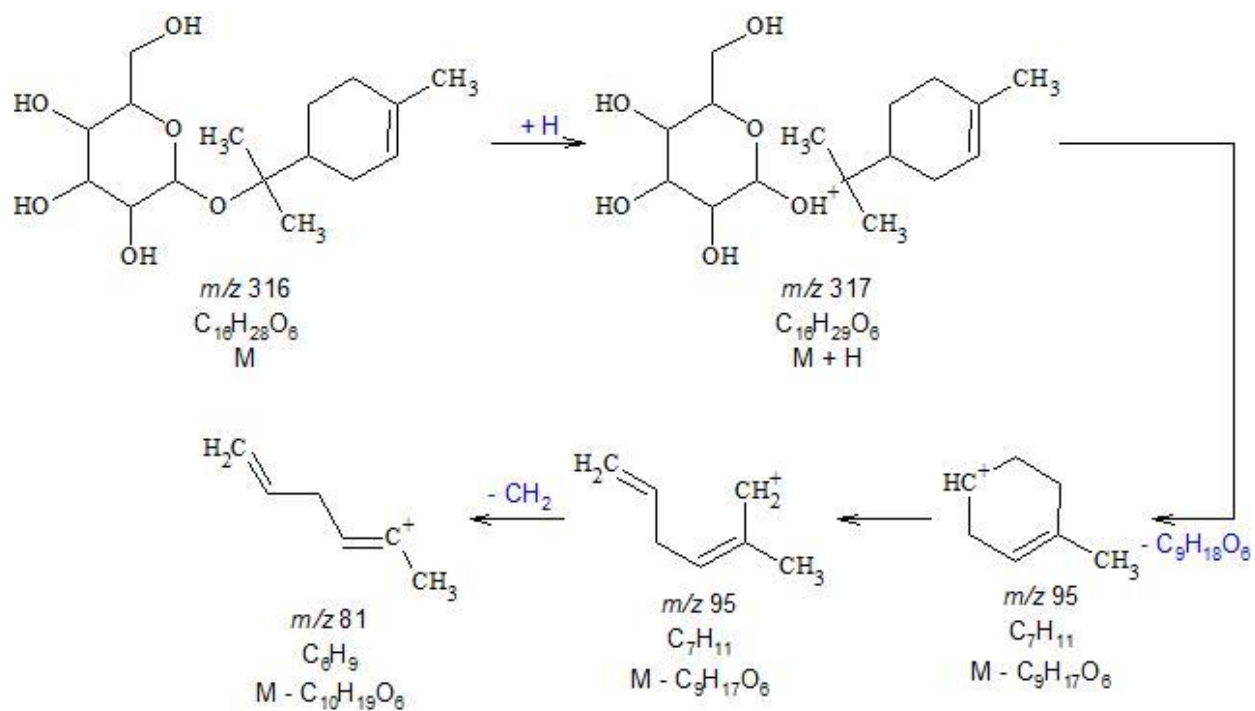

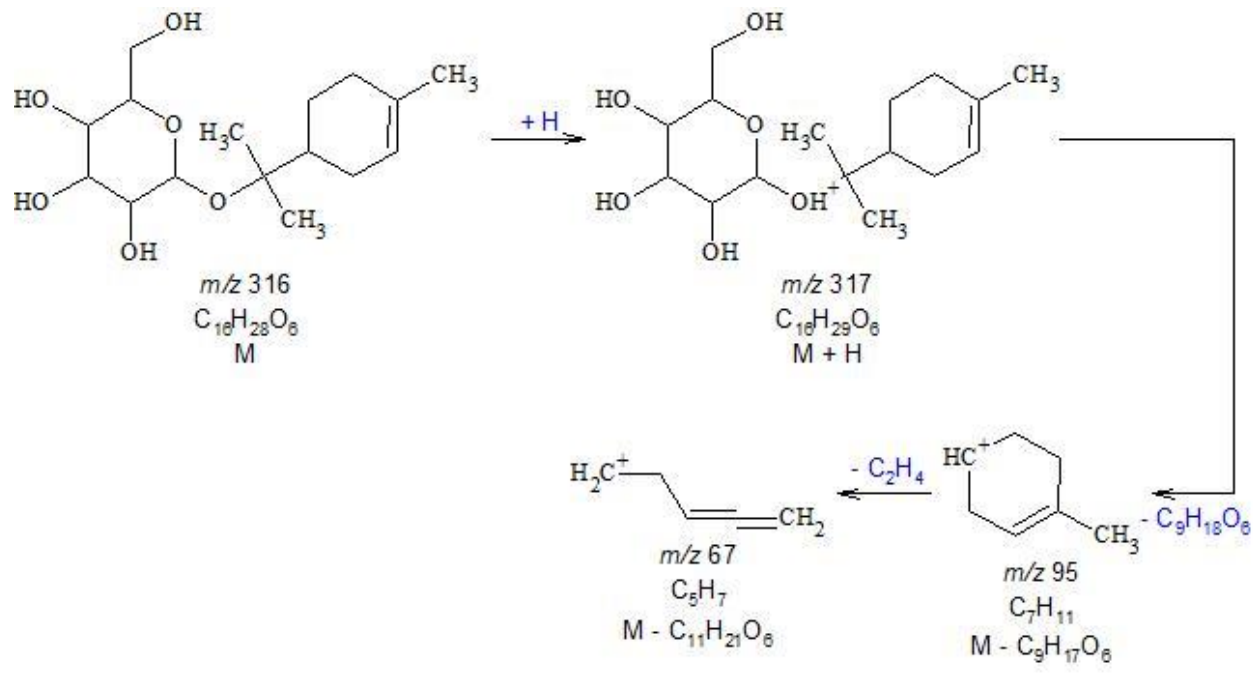

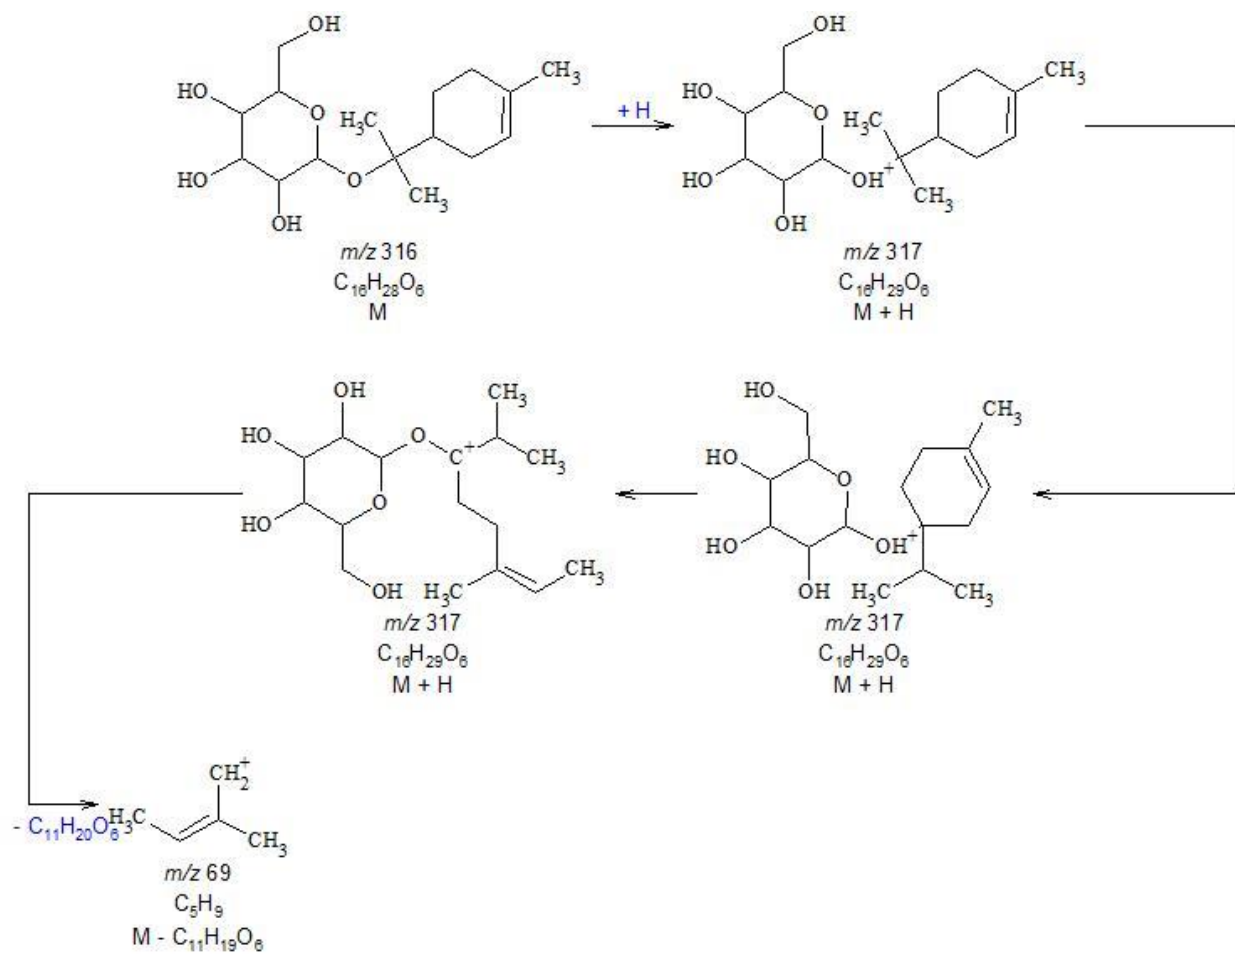

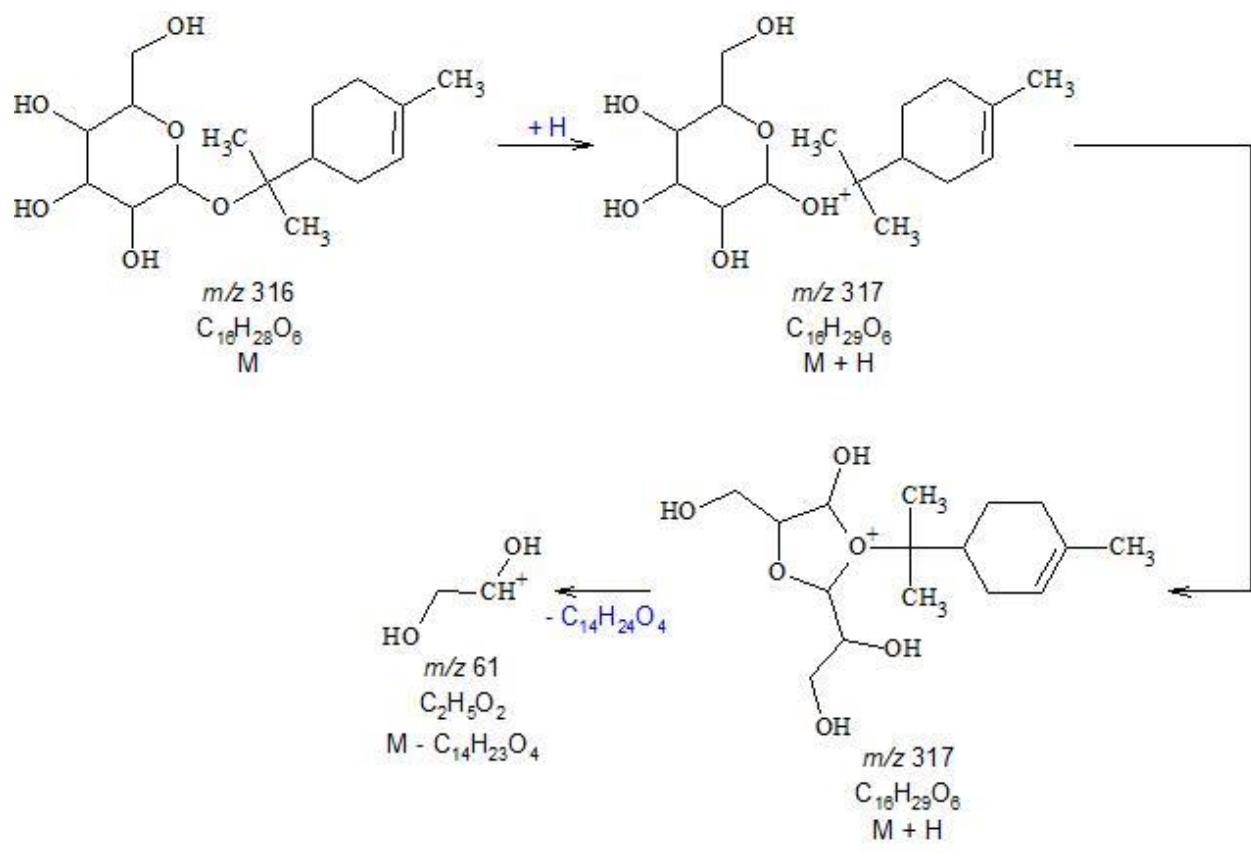

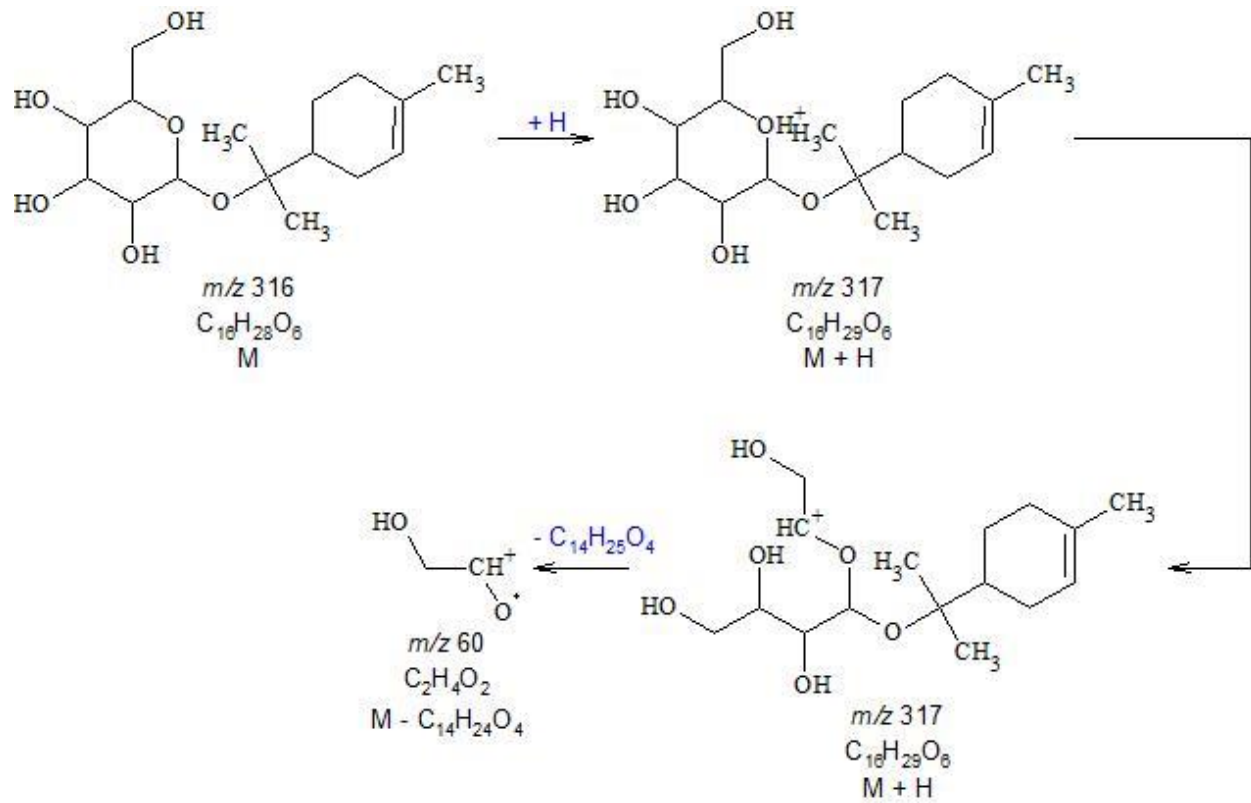

3. Compound 3 (349.2127):

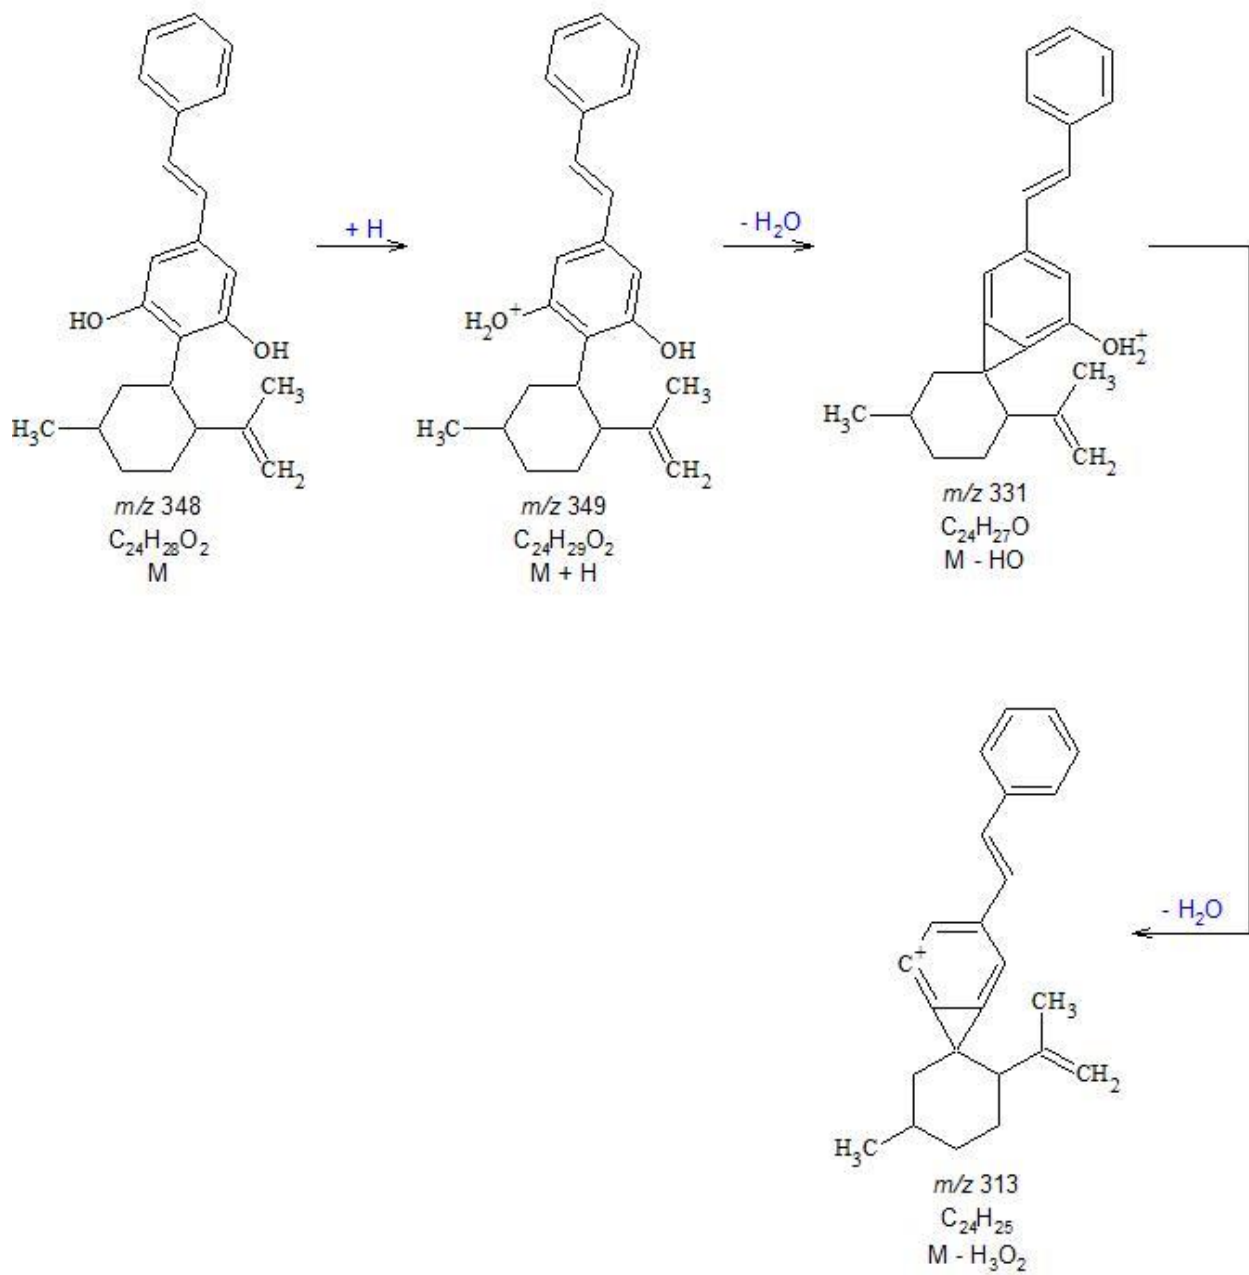

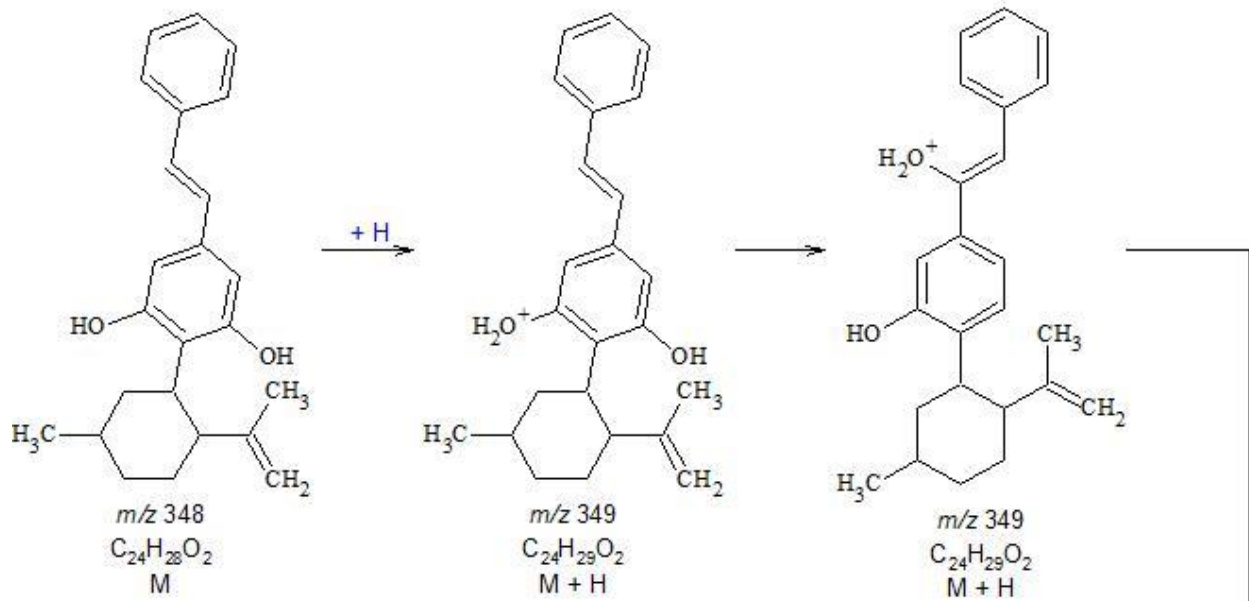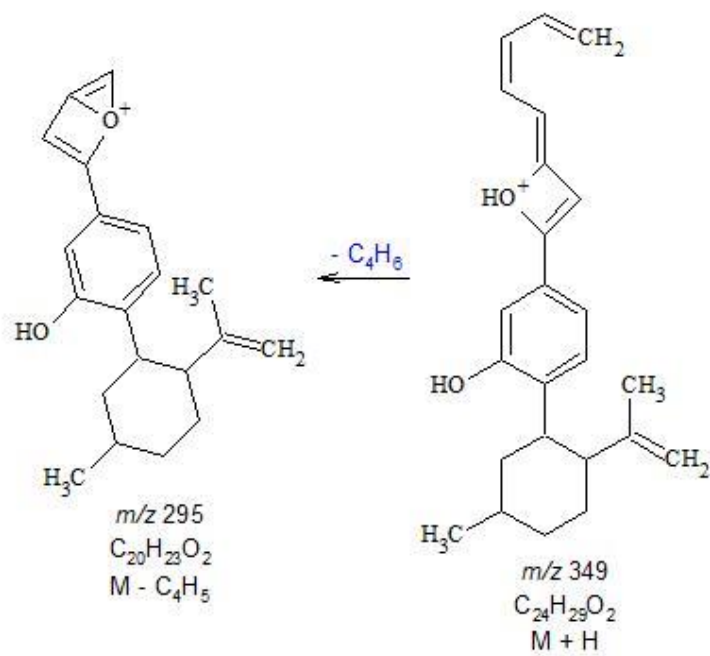

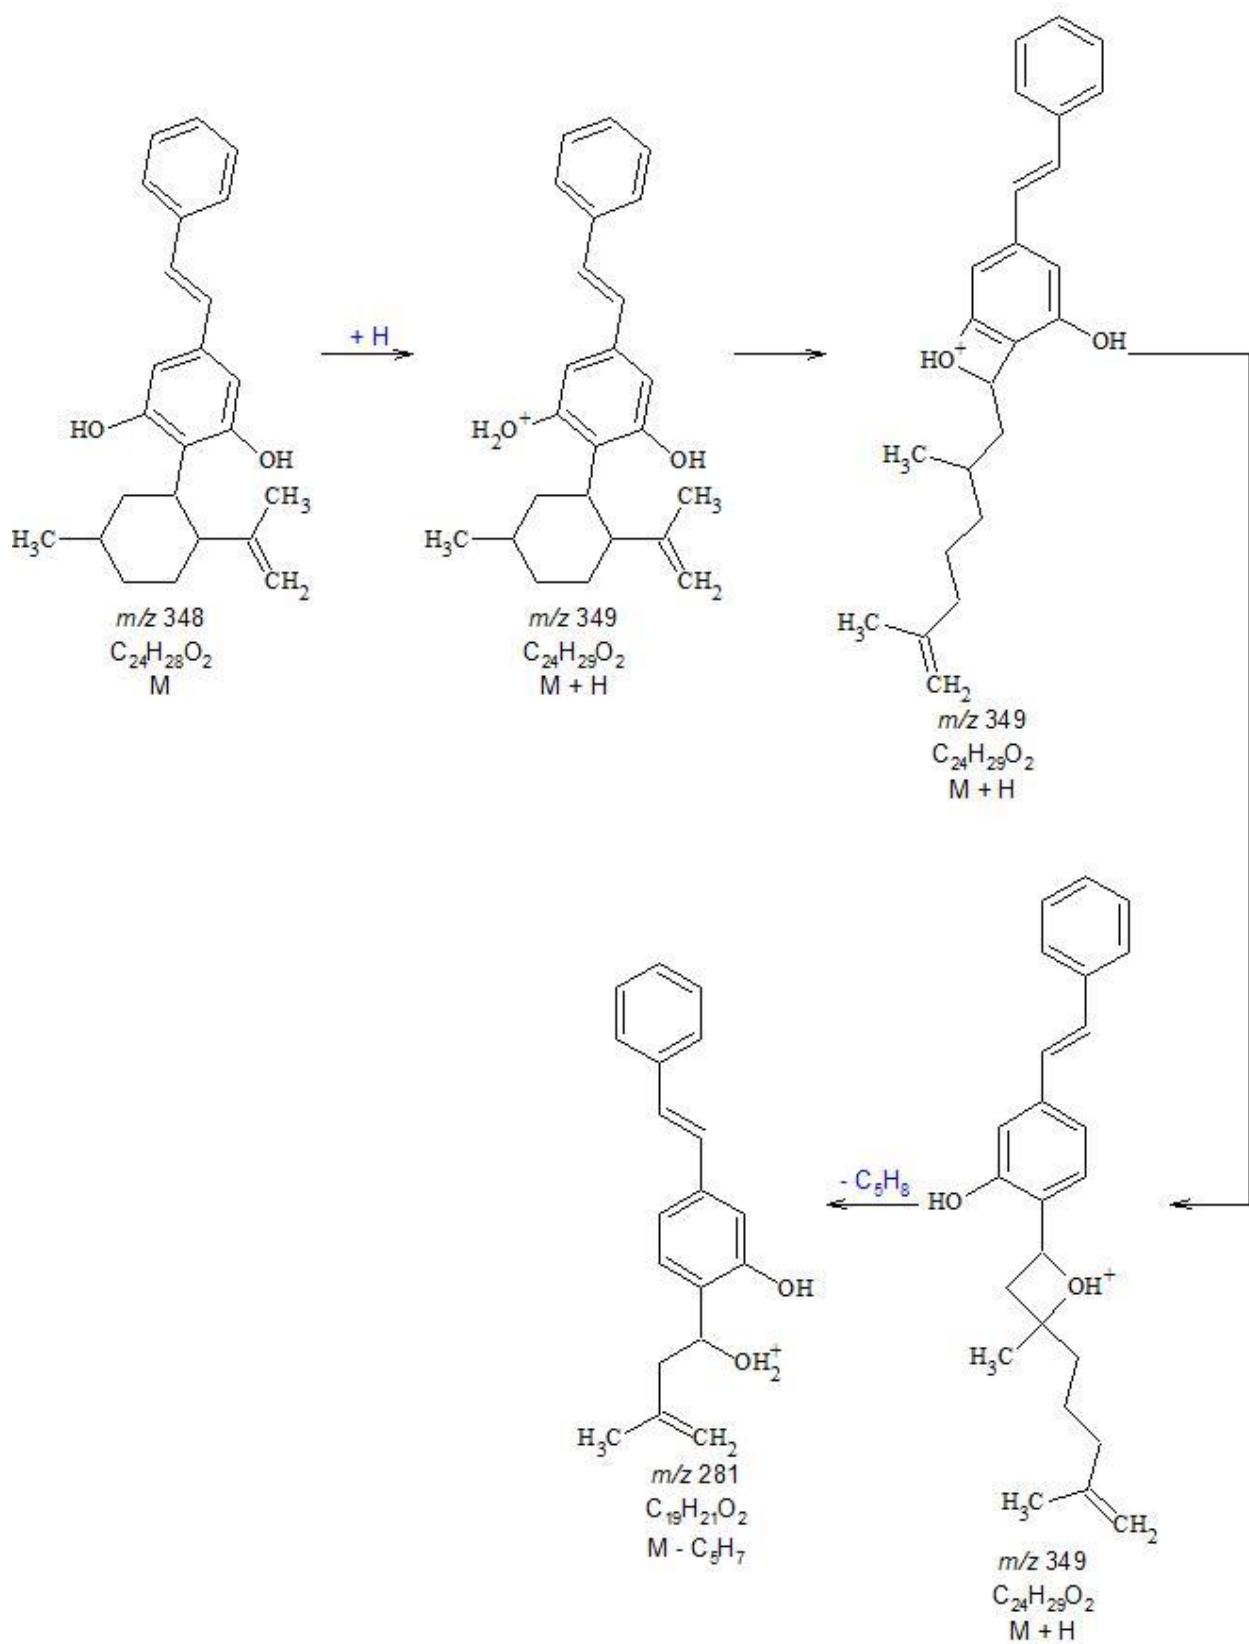



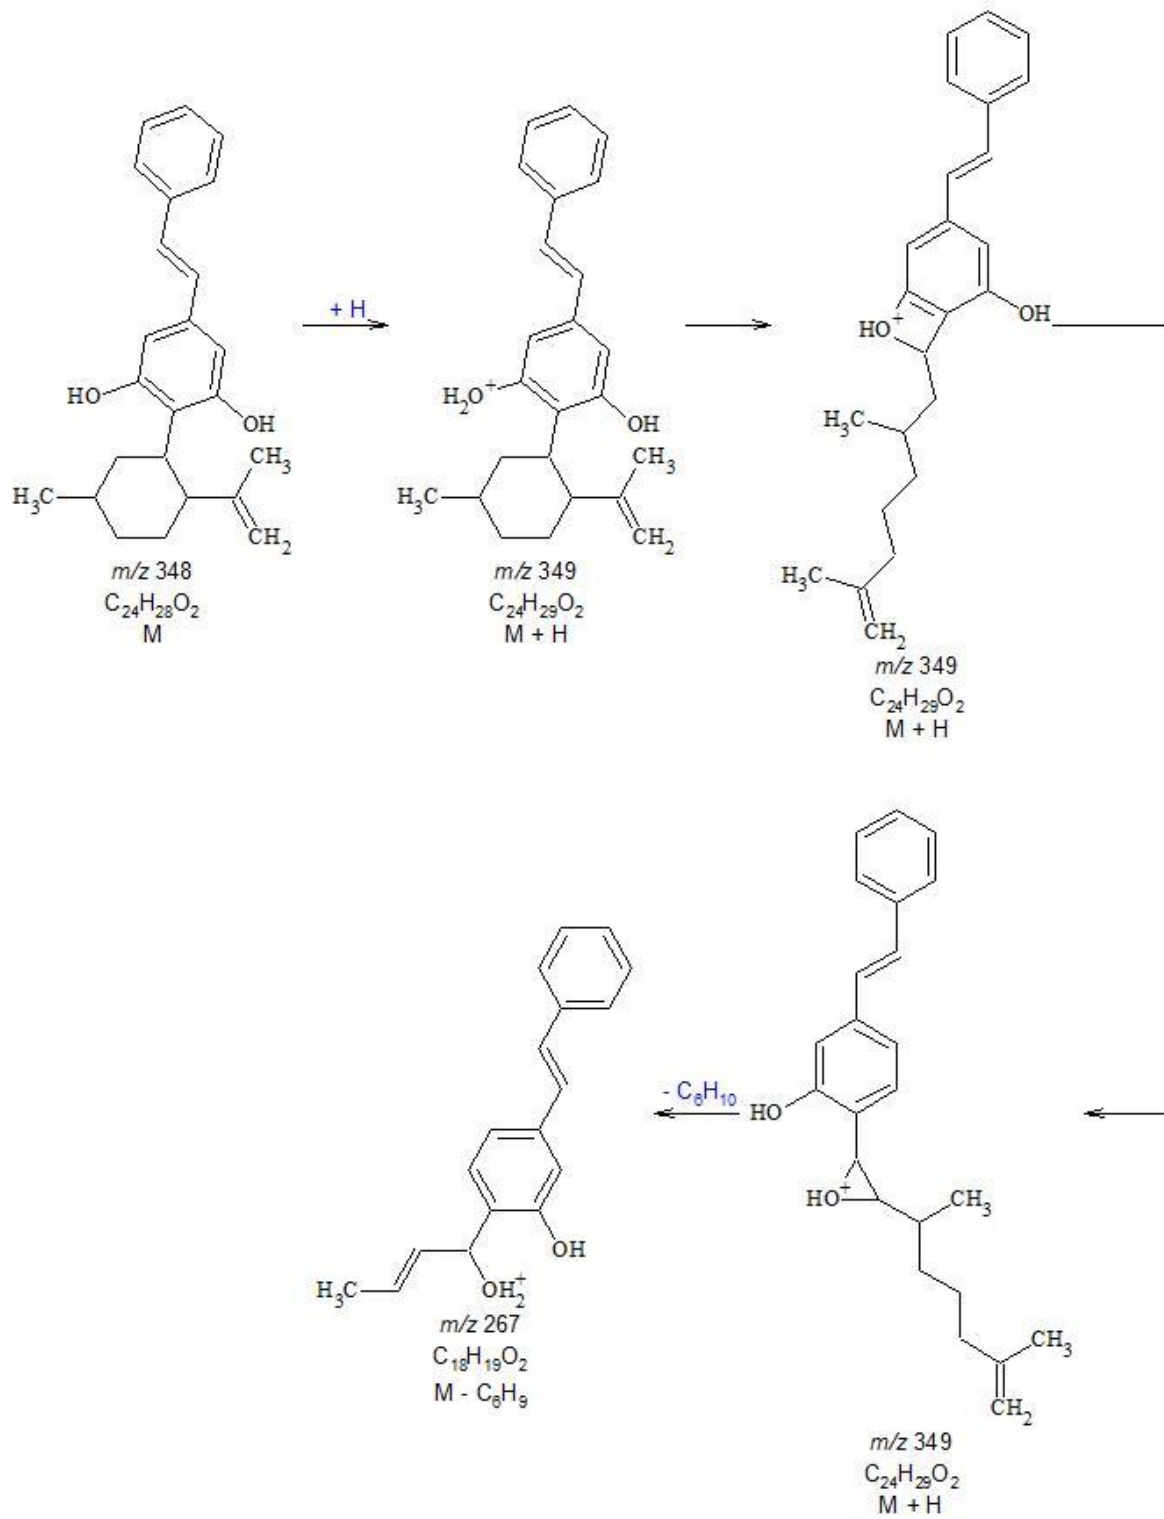

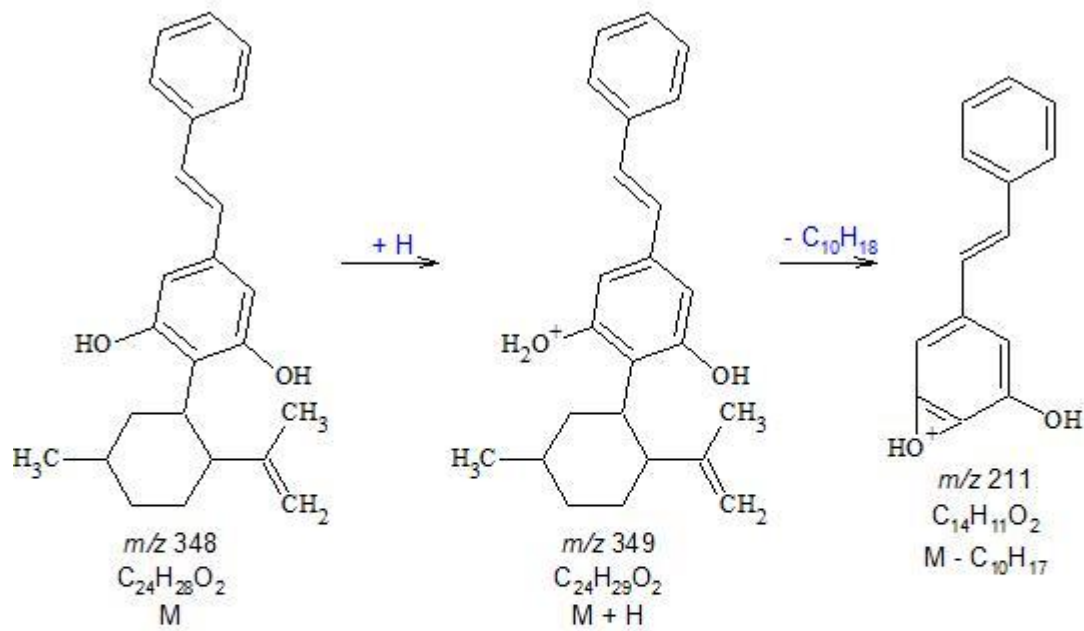

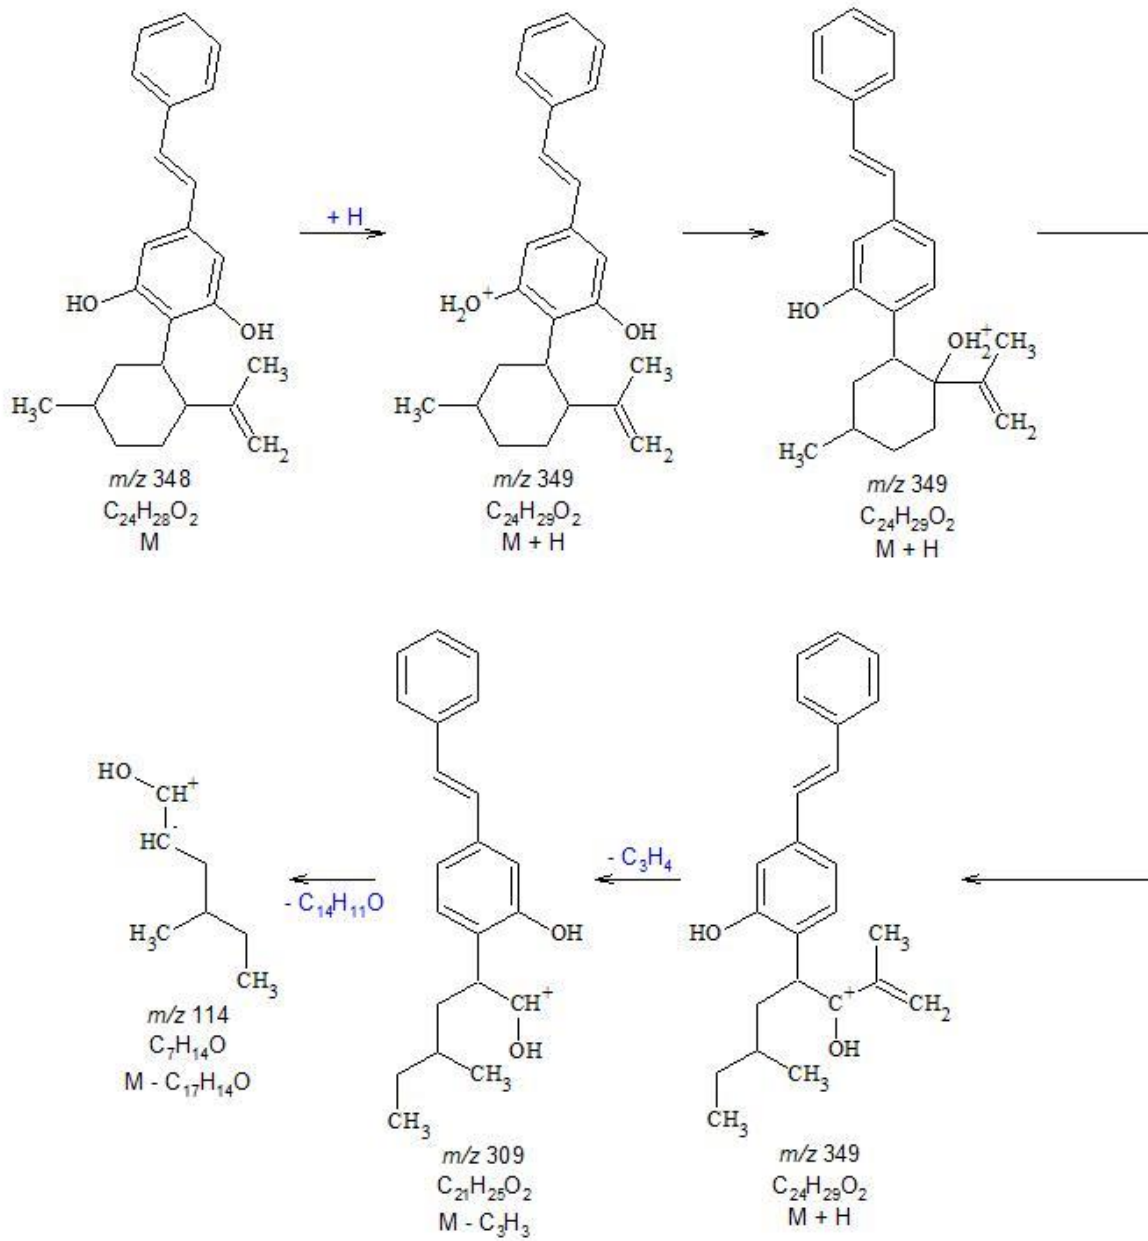

Supplement: molecules-25-05885-s001.pdf [file molecules-25-05885-s001.pdf]
